# Supplementary material for: The S/S Genotype of the 5-HTTLPR (Serotonin-Transporter-Linked Promoter Region) Variant of the SLC6A4 Gene Decreases the Risk of Pre-Eclampsia
Source: MDPI journal article supplement (doi:10.3390/jpm13111535), 2023-10-26
Supplement: s1 [file s1]

## SUPPLEMENTARY MATERIAL -

**Supplementary Table S1.** Comparison of genotype frequencies of the 5-HTTLPR variant between subgroups of PE cases using the recessive inheritance model.

| Group                          | n  | Genotype n (%) |           | *P-value | OR   | 95% CI      |
|--------------------------------|----|----------------|-----------|----------|------|-------------|
|                                |    | S/S            | S/L + L/L |          |      |             |
| PE without severity criteria   | 69 | 22 (31.9)      | 47 (68.1) | 0.85     | 1.02 | 0.41 – 2.52 |
| PE with severity criteria      | 31 | 10 (32.3)      | 21 (67.7) |          |      |             |
| Mild PE -based on proteinuria  | 18 | 10 (55.6)      | 8 (44.4)  | 0.17     | 0.32 | 0.09 – 1.21 |
| Severe PE-based on proteinuria | 21 | 6 (28.6)       | 15 (71.4) |          |      |             |
| Early PE                       | 38 | 14 (36.8)      | 24 (63.3) | 0.55     | 1.43 | 0.61 – 3.36 |
| Late PE                        | 62 | 18 (29)        | 44 (71)   |          |      |             |

\*P-value refers to OR, which comes from calculating it by comparing the proportions of the genotype frequencies between each pair of groups using the recessive model (S/S vs. S/L+L/L).
